# Supplementary material
Source: PubMed Central journal article supplement (PMC6233842)
Supplement: jama-320-1349-s001.pdf [file jama-320-1349-s001.pdf]

## Supplementary Online Content

1  
2  
3  
4  
5  
6  
7  
8  
9  
10  
11  
12  
13  
14  
15  
16  
17  
18  
19  
20  
21  
22  
23  
24

Feller M, Snel M, Moutzouri E, et al. Association of thyroid hormone therapy with quality of life and thyroid-related symptoms in patients with subclinical hypothyroidism: a systematic review and meta-analysis. *JAMA*. doi:10.1001/jama.2018.13770

**eAppendix 1.** Literature Search

**eFigure.** Flow Diagram of the Systematic Review (Study Selection)

**eTable 1.** Description of 28 Excluded Studies (After Independent Evaluation by Two Reviewers)

**eTable 2.** Detailed Results of 21 Included RCTs on Thyroid Hormone Replacement Therapy in Non-pregnant Adults With Subclinical Hypothyroidism, Stratified by Outcomes

**eTable 3.** Risk of Bias Assessment of the 21 Included Randomized Controlled Trials, Adapted From a Template Suggested by the Cochrane Collaboration

**eTable 4.** Summary of Findings and Quality of Evidence (GRADE) on the Effect of Thyroid Hormone Therapy in Non-pregnant Adults With Subclinical Hypothyroidism

**eReferences**

**eAppendix 2.** Adapted Data Collection Form

This supplementary material has been provided by the authors to give readers additional information about their work.

25 **eAppendix 1: Literature Search**

26 The literature search was performed on July 4, 2018 in the following data bases:  
27 PubMed, Embase, Web of Science, COCHRANE Library, CENTRAL, Emcare, Academic Search Premier

28

29 We used the following search strategy:

30 (((subclinical hypothyroid\*[ti] OR "subclinical hypothyroidism"[ti] OR "sub clinical hypothyroidism"[ti] OR ("sub-  
31 clinical"[ti] OR subclinical[ti] OR subclin\*[ti] OR sub-clin\*[ti]) AND ("Hypothyroidism"[majr:noexp] OR  
32 "hypothyroidism"[all fields] OR hypothyroid\*[ti] OR hypo-thyroid\*[ti]))) AND ("Thyroxine"[Mesh] OR  
33 "Thyroxine"[tw] OR thyroxin\*[tw] OR levothyroxin\*[tw] OR "T4 Thyroid Hormone"[tw] OR "O-(4-Hydroxy-3,5-  
34 diiodophenyl) 3,5-diiodo-L-tyrosine"[tw] OR "L-3,5,3',5'-Tetraiodothyronine"[tw] OR "Levothyroxine"[tw] OR "L-  
35 Thyroxine"[tw] OR "L Thyroxine"[tw] OR "3,5,3',5'-Tetraiodothyronine"[tw] OR "O-(4-Hydroxy-3,5-diiodophenyl)-  
36 3,5-diiodotyrosine"[tw] OR "L-Thyroxin Henning"[tw] OR "L Thyroxin Henning"[tw] OR "LThyroxin Henning"[tw]  
37 OR "Levothyroxine Sodium"[tw] OR "Sodium Levothyroxine"[tw] OR "Levoxine"[tw] OR "Levoxy"[tw] OR  
38 "Lévothyrox"[tw] OR "L-Thyroxine Roche"[tw] OR "L Thyroxine Roche"[tw] OR "Levo-T"[tw] OR "Levo T"[tw] OR  
39 "LevoT"[tw] OR "Levothroid"[tw] OR "Novothyral"[tw] OR "Berlthyrox"[tw] OR "Dexnon"[tw] OR  
40 "Novothyrox"[tw] OR "Oroxine"[tw] OR "Synthroid"[tw] OR "Synthrox"[tw] OR "Thyrax"[tw] OR "Tiroidine"[tw]  
41 OR "Tiroxina Leo"[tw] OR "Unithroid"[tw] OR "Eferox"[tw] OR "Eltroxin"[tw] OR "Thevier"[tw] OR "Eltroxine"[tw]  
42 OR "Euthyrox"[tw] OR "Eutirox"[tw] OR "L-Thyrox"[tw] OR "L Thyrox"[tw] OR "L-Thyroxin beta"[tw] OR "L  
43 Thyroxin beta"[tw] OR "LThyroxin beta"[tw] OR "Levothyroid"[tw] OR "Levothyroxin Deladande"[tw] OR  
44 "Levothyroxin Delalande"[tw])) OR ((subclinical hypothyroid\*[tw] OR "subclinical hypothyroidism"[tw] OR "sub  
45 clinical hypothyroidism"[tw] OR ("sub-clinical"[tw] OR subclinical[tw] OR subclin\*[tw] OR sub-clin\*[tw]) AND  
46 ("Hypothyroidism"[Mesh:noexp] OR "hypothyroidism"[all fields] OR hypothyroid\*[tw] OR hypo-thyroid\*[tw]))) AND  
47 ("Thyroxine"[majr] OR "Thyroxine"[ti] OR thyroxin\*[ti] OR levothyroxin\*[ti] OR "T4 Thyroid Hormone"[ti] OR "O-  
48 (4-Hydroxy-3,5-diiodophenyl) 3,5-diiodo-L-tyrosine"[ti] OR "L-3,5,3',5'-Tetraiodothyronine"[ti] OR  
49 "Levothyroxine"[ti] OR "L-Thyroxine"[ti] OR "L Thyroxine"[ti] OR "3,5,3',5'-Tetraiodothyronine"[ti] OR "O-(4-  
50 Hydroxy-3,5-diiodophenyl)-3,5-diiodotyrosine"[ti] OR "L-Thyroxin Henning"[ti] OR "L Thyroxin Henning"[ti] OR  
51 "LThyroxin Henning"[ti] OR "Levothyroxine Sodium"[ti] OR "Sodium Levothyroxine"[ti] OR "Levoxine"[ti] OR  
52 "Levoxy"[ti] OR "Lévothyrox"[ti] OR "L-Thyroxine Roche"[ti] OR "L Thyroxine Roche"[ti] OR "Levo-T"[ti] OR  
53 "Levo T"[ti] OR "LevoT"[ti] OR "Levothroid"[ti] OR "Novothyral"[ti] OR "Berlthyrox"[ti] OR "Dexnon"[ti] OR  
54 "Novothyrox"[ti] OR "Oroxine"[ti] OR "Synthroid"[ti] OR "Synthrox"[ti] OR "Thyrax"[ti] OR "Tiroidine"[ti] OR  
55 "Tiroxina Leo"[ti] OR "Unithroid"[ti] OR "Eferox"[ti] OR "Eltroxin"[ti] OR "Thevier"[ti] OR "Eltroxine"[ti] OR  
56 "Euthyrox"[ti] OR "Eutirox"[ti] OR "L-Thyrox"[ti] OR "L Thyrox"[ti] OR "L-Thyroxin beta"[ti] OR "L Thyroxin  
57 beta"[ti] OR "LThyroxin beta"[ti] OR "Levothyroid"[ti] OR "Levothyroxin Deladande"[ti] OR "Levothyroxin  
58 Delalande"[ti])) NOT ("Animals"[mesh] NOT "Humans"[mesh]) NOT ("Child"[mesh] OR "Infant"[mesh] OR  
59 "Adolescent"[mesh]) NOT "Adult"[mesh]) NOT ("Pregnancy"[majr] OR "Pregnancy Complications"[majr] OR  
60 pregnant\*[ti] OR pregnanc\*[ti])  
61

62 **eFigure:** Flow Diagram of the Systematic Review (Study Selection)

63

64

65

66

67

68

69

70

71

72

73

74

75

76

77

78

79

80

81

82

83

84

85

86

87

88

89

90

91

92

Identification

Screening

Eligibility

Included

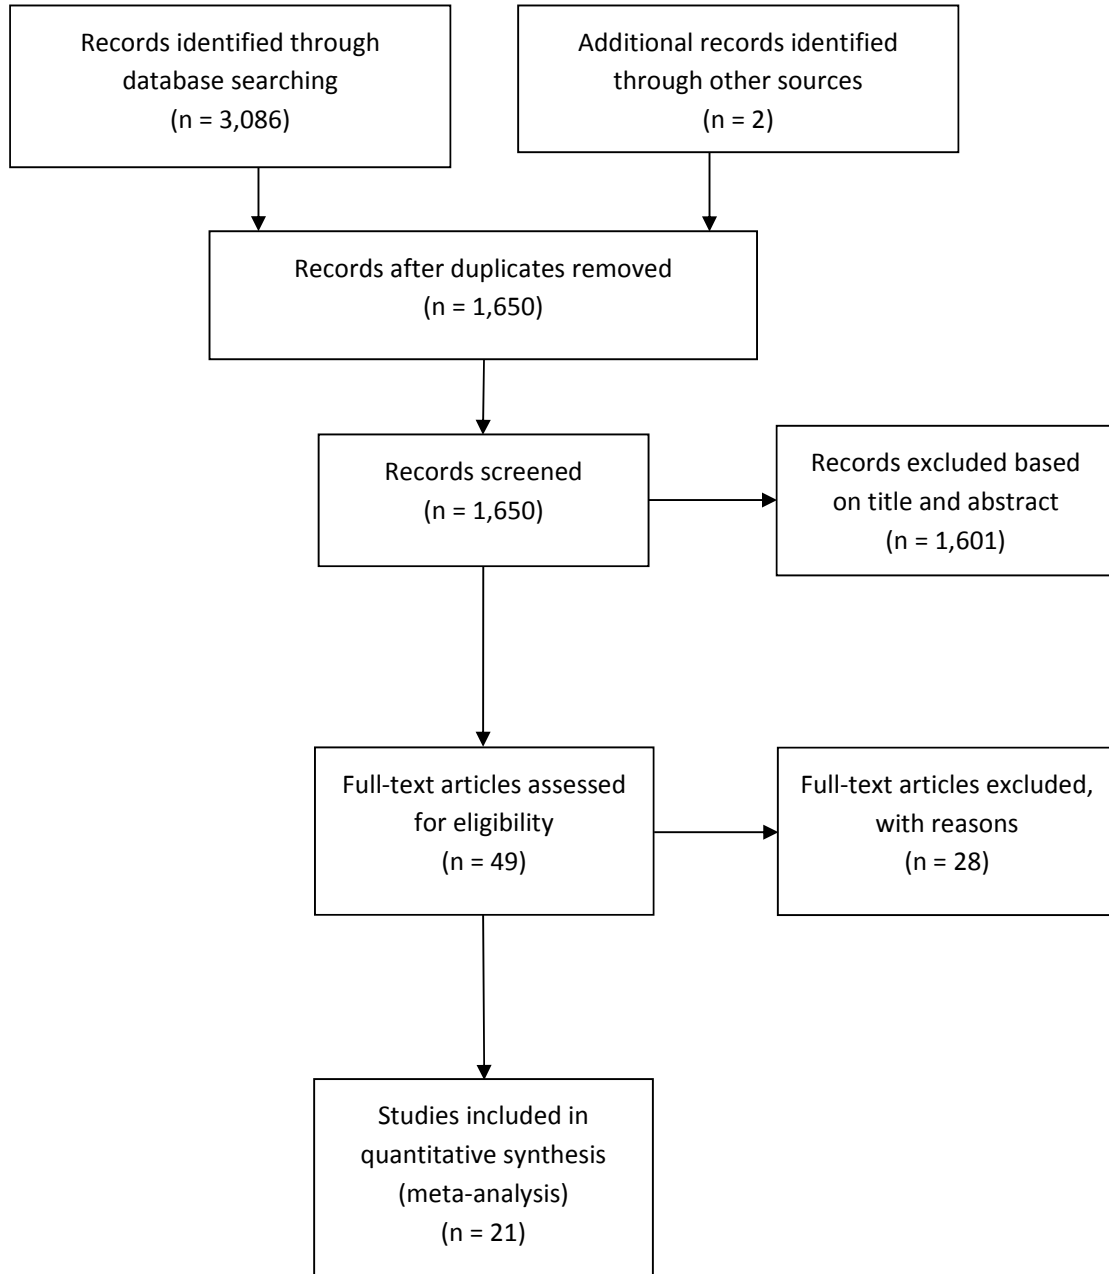

93 **eTable 1:** Description of 28 Excluded Studies (After Independent Evaluation by Two Reviewers)

94

| Author, year                    | Study Design | n   | Study population                                         | Definition of thyroid dysfunction            | Intervention  | Outcome                                                                                                    | Reason for exclusion                                                                          |
|---------------------------------|--------------|-----|----------------------------------------------------------|----------------------------------------------|---------------|------------------------------------------------------------------------------------------------------------|-----------------------------------------------------------------------------------------------|
| Chen, <sup>1</sup> 2018         | RCT          | 92  | SCH and diabetic nephropathy                             | TSH > 4.94 µIU/mL normal fT4, and T3         | Levothyroxine | - Urinary albumin excretion rate<br>- Lipids<br>- Renal function                                           | Patients with SCH & diabetic nephropathy<br>Outcomes beyond scope of this review              |
| Stott, <sup>2</sup> 2017        | RCT          | -   | -                                                        | -                                            | -             | -                                                                                                          | Publication of the protocol of the study by Stott et. al. <sup>3</sup>                        |
| Liu, <sup>4</sup> 2017          | RCT          | 330 | SCH                                                      | TSH >4.2mU/l + normal fT4 on 2 occasions     | Levothyroxine | - Presence of non alcoholic fatty liver disease<br>- Serum liver enzymes<br>- Lipids<br>- BMI<br>- Glucose | Same study population and outcome (BMI) as in the included study by Zhao et. al. <sup>5</sup> |
| Razvi, <sup>6</sup> 2016        | RCT          | 48  | Patients with primary hypothyroidism under levothyroxine | Patients were euthyroid under levothyroxine  | Levothyroxine | Feasibility study                                                                                          | 2 doses of levothyroxine were compared                                                        |
| Shahebrahimi, <sup>7</sup> 2015 | RCT          | 100 | SCH                                                      | TSH >4.7mU/l + normal fT4                    | Levothyroxine | Lipids                                                                                                     | Outcomes beyond scope of this review                                                          |
| Liu, <sup>8</sup> 2015          | RCT          | 136 | SCH and diabetic nephropathy                             | TSH 4.0-7.0mU/l, normal fT4, TPO-Ab positive | Levothyroxine | - Urinary albumin excretion rate<br>- Blood pressure<br>- Lipids<br>- Uric acid<br>- Renal function        | Patients with SCH & diabetic nephropathy                                                      |
| Deshmukh, <sup>9</sup> 2012     | RCT          | 65  | SCH                                                      | Adults with subclinical hypothyroidism       | Levothyroxine | Quality of Life                                                                                            | No placebo control group, levothyroxine compared with "lifestyle measures"                    |
| Malek, <sup>10</sup> 2012       | RCT          | 60  | SCH                                                      | TSH >4.5mU/l, normal fT4, positive TPO-Ab    | Levothyroxine | Cognitive function                                                                                         | Duplicate of the included study by Aghili et. al. <sup>11</sup>                               |
| Martins, <sup>12</sup> 2011     | RCT          | 33  | SCH                                                      | TSH >4mU/l + normal fT4 on 2 occasions       | Levothyroxine | Echocardiographic measurements                                                                             | Outcomes beyond scope of this review                                                          |

|                                  |                      |     |                                                        |                                                                                                          |                                        |                                                    |                                                                                                 |
|----------------------------------|----------------------|-----|--------------------------------------------------------|----------------------------------------------------------------------------------------------------------|----------------------------------------|----------------------------------------------------|-------------------------------------------------------------------------------------------------|
| Abu-Helalah, <sup>13</sup> 2010  | RCT                  | 56  | SCH                                                    | Participants with family history of thyroid disease, with 'high' TSH, defined used a cut-off of 4.0 mU/L | Thyroxine                              | Quality of Life                                    | Authors contacted, replied, but unable to provide necessary data                                |
| Teixeira, <sup>14</sup> 2008     | RCT                  | -   | -                                                      | -                                                                                                        | -                                      | -                                                  | Duplicate of the included study by Teixeira et. al. <sup>15</sup>                               |
| Mikhail, <sup>16</sup> 2008      | RCT                  | 120 | SCH                                                    | TSH 4-10mU/l + normal ft4 on 2 occasions                                                                 | Levothyroxine                          | Lipids                                             | Outcomes beyond scope of this review                                                            |
| Kalantari, <sup>17</sup> 2006    | RCT                  | 80  | SCH                                                    | TSH >5mU/l + normal ft4 on 2 occasions, TPO-Ab positive                                                  | Levothyroxine                          | Lipids                                             | Outcomes beyond scope of this review                                                            |
| Franzoni, <sup>18</sup> 2006     | RCT                  | 42  | SCH                                                    | TSH >3.6mU/l + normal ft3/4                                                                              | Levothyroxine                          | Echocardiographic measurements                     | Outcomes beyond scope of this review                                                            |
| Fadeyev, <sup>19</sup> 2006      | RCT                  | 33  | SCH + coronary artery disease                          | TSH >4mU/l (2 tests) + normal ft4                                                                        | Levothyroxine                          | Lipids                                             | - Outcomes beyond scope of this review<br>- Study population with SCH & coronary artery disease |
| Christ-Crain, <sup>20</sup> 2005 | Case-control and RCT | 161 | SCH                                                    | TSH >5mU/l on 2 consecutive tests, ft4 normal                                                            | Levothyroxine in the RCT subpopulation | Cardiac biomarkers                                 | Outcomes beyond scope of this review                                                            |
| Meier, <sup>21</sup> 2004        | RCT                  | 66  | Same study population as in Christ-Crain et. al.(2003) | TSH >5mU/l on 2 consecutive tests, ft4 normal                                                            | Levothyroxine                          | Bone turnover markers                              | Outcomes beyond scope of this review                                                            |
| Christ-Crain, <sup>22</sup> 2004 | RCT                  | 66  | Same study population as in Christ-Crain et. al.(2003) | TSH >5mU/l on 2 consecutive tests, ft4 normal                                                            | Levothyroxine                          | Surrogate markers of skeletal and cardiac function | Outcomes beyond scope of this review                                                            |
| Meier, <sup>23</sup> 2003        | RCT                  | 66  | Same study population as in Christ-Crain et. al.(2003) | TSH >5mU/l on 2 consecutive tests, ft4 normal                                                            | Levothyroxine                          | Prolactin                                          | Outcomes beyond scope of this review                                                            |
| Christ-Crain, <sup>24</sup> 2003 | RCT                  | 66  | SCH                                                    | TSH >5mU/l on 2 consecutive tests, ft4 normal                                                            | Levothyroxine                          | Hematologic parameters                             | Outcomes beyond scope of this review                                                            |
| Kong, <sup>25</sup> 2002         | RCT                  | -   | -                                                      | -                                                                                                        | -                                      | -                                                  | Duplicate of the included study by Kong et. al. <sup>26</sup>                                   |

|                               |                |    |                                  |                                                                                                                                                                                                                                                  |               |                                                            |                                                                         |
|-------------------------------|----------------|----|----------------------------------|--------------------------------------------------------------------------------------------------------------------------------------------------------------------------------------------------------------------------------------------------|---------------|------------------------------------------------------------|-------------------------------------------------------------------------|
| Jensovsky, <sup>27</sup> 2002 | Interventional | 60 | SCH + controls                   | Not explicitly reported                                                                                                                                                                                                                          | Levothyroxine | Electroencephalography                                     | Not randomized                                                          |
| Biondi, <sup>28</sup> 1999    | Interventional | 56 | SCH + Control                    | Elevated TSH + fT4 "low normal"                                                                                                                                                                                                                  | Thyroxine     | Echocardiographic measurements                             | Not randomized                                                          |
| Jaeschke, <sup>29</sup> 1996  | RCT            | 31 | SCH                              | TSH >6mU/l on ≥2 occasions + normal fT3/4                                                                                                                                                                                                        | Levothyroxine | - Quality of Life,<br>- Fatigue,<br>- Mood,<br>- Cognition | Authors contacted, replied, but unable to provide necessary data        |
| Ross, <sup>30</sup> 1993      | RCT            | 17 | SCH                              | Elevated TSH + normal fT4                                                                                                                                                                                                                        | Levothyroxine | Bone mineral density                                       | Outcomes beyond scope of this review                                    |
| Nikolai, <sup>31</sup> 1990   | Interventional | 22 | Women with premenstrual syndrome | -                                                                                                                                                                                                                                                | -             | -                                                          | Study population does not have SCH                                      |
| Nyström, <sup>32</sup> 1988   | RCT            | 20 | Women with SCH                   | Patients with baseline TSH above 4.0mU /l without clinical evidence of thyroid disease, having T4, free T4 and T3 concentrations within the reference interval but exaggerated TSH response (TSH above 30 mU/l) upon thyroliberin administration | Levothyroxine | - Quality of Life<br>- Cognition                           | Authors contacted, but no reply received (corresponding author retired) |
| Evered, <sup>33</sup> 1973    | Interventional | 22 | Hypothyroidism                   | Elevated TSH + hypothyroid symptoms                                                                                                                                                                                                              | Thyroxine     | Normal TSH concentration                                   | No control group                                                        |

95 **Abbreviations:** y, year; **RCT**, randomized controlled trial; n, number of participants; **SCH**, subclinical hypothyroidism; **TSH**, thyroid-stimulating hormone; **fT4**, free  
96 thyroxine; **TPO-Ab**, thyroid peroxidase antibody.

97 **eTable 2:** Detailed Results of 21 Included RCTs on thyroid Hormone Replacement  
 98 Therapy in Non-pregnant Adults With Subclinical Hypothyroidism, Stratified by Outcomes

| Study, year<br>Study<br>duration                                                                    | Intervention vs.<br>placebo<br>- N<br>- Mean TSH,<br>- at baseline<br>- at follow-up | Outcome<br>Original results (Intervention vs placebo)<br>B: baseline<br>E: at end of intervention                                                                          | SMD (95%CI) <sup>a</sup> |
|-----------------------------------------------------------------------------------------------------|--------------------------------------------------------------------------------------|----------------------------------------------------------------------------------------------------------------------------------------------------------------------------|--------------------------|
| <b>Thyroid-related symptoms / General quality of life / Tiredness/Fatigue / Depressive Symptoms</b> |                                                                                      |                                                                                                                                                                            |                          |
| Stott, <sup>3</sup> 2017<br>12 months                                                               | 368 vs 369<br>6.4 vs 6.4<br>3.6 vs 5.5                                               | <b>ThyPRO Hypothyroid symptoms score</b><br>B: 17.5 (±18.8) vs 16.9 (±17.9)<br>E: 16.6 (±16.9) vs 16.7 (±17.5)<br>Difference (95%CI)<br>0.0 (-2.0 to 2.1)                  | 0.01 (-0.15 to 0.16)     |
|                                                                                                     |                                                                                      | <b>Quality of life (EQ-5D)</b><br>B: 0.85 (±0.19) vs 0.85 (±0.17)<br>E: 0.83 (±0.21) vs 0.85 (±0.19)<br>Difference (95%CI)<br>-0.03 (-0.05 to 0.00)                        | -0.10 (-0.25 to 0.06)    |
|                                                                                                     |                                                                                      | <b>ThyPRO Tiredness score</b><br>B: 25.9 (±20.6) vs 25.5 (±20.3)<br>E: 28.7 (±20.2) vs 28.6 (±19.5)<br>Difference (95%CI)<br>0.4 (-2.1 to 2.9)                             | -0.01 (-0.16 to 0.15)    |
| Najafi, <sup>34</sup> 2015<br>3 months                                                              | 30 vs 30<br>8.3 vs 8.1<br>2.0 vs 7.8                                                 | <b>Depressive symptoms (BDI)</b><br>B: 16.8 (±13.3) vs 13.8 (±11.7)<br>E: 12.4 (±10.0) vs 11.9 (±10.7)                                                                     | -0.05 (-0.56 to 0.46)    |
| Reuters, <sup>35</sup><br>2012<br>6 months                                                          | 35 vs 36<br>7.3 vs 7.6<br>nr vs nr                                                   | <b>Hypothyroid symptoms (Zulewski score)</b><br>Post-treatment / pre-treatment difference<br>(SD)<br>Levothyroxine: -0.5 (±1.2)<br>Placebo: -0.8 (±1.6)                    | -0.22 (-0.74 to 0.31)    |
|                                                                                                     |                                                                                      | <b>Quality of life (SF-36)</b><br>Post-treatment / pre-treatment difference<br>(SD)<br>Levothyroxine: 9.9 (±27.0)<br>Placebo: 0.7 (±26.1)                                  | 0.35 (-0.18 to 0.87)     |
|                                                                                                     |                                                                                      | <b>Depressive symptoms (BDI)</b><br>Post-treatment / pre-treatment difference<br>(SD)<br>Levothyroxine: -2.4 (±5.8)<br>Placebo: -2.1 (±4.8)                                | 0.06 (-0.56 to 0.46)     |
| Parle, <sup>36</sup> 2010<br>12 months                                                              | 52 vs 42<br>6.6 vs 6.6<br>3.7 vs 5.5                                                 | <b>Depressive symptoms (HADS)</b><br>B: 3.4 (±2.6) vs 2.9 (±2.6)<br>E: 3.6 (±2.5) vs 3.3 (±2.8)<br>Difference (95%CI)<br>0.18 (-0.64 to 1.00)                              | -0.11 (-0.52 to 0.29)    |
| Razvi, <sup>37</sup> 2007<br>3 months                                                               | 100 (cross-over)<br>5.3<br>0.5                                                       | <b>(Thyroid-related) Quality of life (ThyDQoL)</b><br>Effect under L-thyroxine -1.1 (±1.0)<br>Effect under placebo -1.2 (±0.9)<br>Difference (95%CI)<br>0.2 (0.02 to 0.36) | 0.11 (-0.29 to 0.50)     |
| Jorde, <sup>38</sup> 2006<br>12 months                                                              | 36 vs 33<br>5.8 vs 5.3<br>1.5 vs 5.4                                                 | <b>Quality of life (GHQ-30 (total score))</b><br>B: 1.5 (±2.3) vs 0.7 (±1.3)<br>E: 1.9 (±3.3) vs 1.2 (±2.0)                                                                | -0.25 (-0.74 to 0.23)    |
|                                                                                                     |                                                                                      | <b>Depressive symptoms (BDI)</b><br>B: 4.4 (±3.7) vs 3.7 (±3.8)<br>E: 4.3 (±3.6) vs 3.3 (±3.3)                                                                             | -0.26 (-0.74 to 0.22)    |

|                                         |                                        |                                                                                                                                                                                                                  |                        |
|-----------------------------------------|----------------------------------------|------------------------------------------------------------------------------------------------------------------------------------------------------------------------------------------------------------------|------------------------|
| Kong, <sup>26</sup> 2002<br>6 months    | 23 vs 17<br>8.0 vs 7.3<br>3.4 vs 5.6   | <b>Quality of life (GHQ-30)</b><br>B (IQR): 5 (0 to 15) vs 5 (2 to 11)<br>Change from baseline to 6 months (IQR)<br>-3 (-11 to 1) vs -5 (-10 to -1)                                                              | -1.00 (-1.73 to -0.27) |
| Meier, <sup>39</sup> 2001<br>12 months  | 33 vs 33<br>12.8 vs 10.7<br>3.1 vs 9.9 | <b>Hypothyroid symptoms (Billewicz score)</b><br>B: -25.7 (±15.2) vs -28.3 (±14.1)<br>E: -32.1 (±11.9) vs -30.8 (±14.1)                                                                                          | 0.10 (-0.39 to 0.59)   |
| <b>Cognitive function</b>               |                                        |                                                                                                                                                                                                                  |                        |
| Stott, <sup>3</sup> 2017<br>18 months   | 368 vs 369<br>6.4 vs 6.4<br>3.6 vs 5.5 | <b>Letter-digit coding test</b><br>B: 28.0 (±10.2) vs 25.2 (±8.3)<br>E: 27.5 (±10.5) vs 27.1 (±11.2)<br>Between group difference (95%CI) at final follow-up visit<br>-0.1 (-0.9, 0.7)                            | 0.04 (-0.12 to 0.19)   |
| Aghili, <sup>11</sup> 2012<br>3 months  | 30 vs 30<br>8.3 vs 8.1<br>2.0 vs 7.8   | <b>Wechsler memory scale</b><br>B: 105.7 (±11.7) vs 105.9 (±11.5)<br>E: 115.6 (±14.0) vs 109.1 (±13.7)<br>Change from baseline to 3 months<br>9.9 (±8.0) vs 3.2 (±7.6)                                           | 0.47 (-0.04 to 0.98)   |
| Parle, <sup>36</sup> 2010<br>12 months  | 52 vs 42<br>6.6 vs 6.6<br>3.7 vs 5.5   | <b>MMSE</b><br>28.3 (±2.0) vs 28.2 (±2.1)<br>28.3 (±2.1) vs 28.3 (±1.9)<br>Difference (95%CI)<br>0.03 (-1.12 to 1.17)                                                                                            | 0.01 (-0.39 to 0.42)   |
| Jorde, <sup>38</sup> 2006<br>12 months  | 36 vs 33<br>5.8 vs 5.3<br>1.5 vs 5.4   | <b>Composite cognitive score (range unclear, higher scores mean better cognition)</b><br>B: 1.8 (±3.4) vs -1.1 (±4.7)<br>E: 1.5 (±3.7) vs -0.9 (±4.8)                                                            | 0.32 (-0.17 to 0.80)   |
| <b>Muscle strength</b>                  |                                        |                                                                                                                                                                                                                  |                        |
| Stott, <sup>3</sup> 2017<br>12 months   | 368 vs 369<br>6.4 vs 6.4<br>3.6 vs 5.5 | <b>Handgrip strength (in kg)</b><br>B: 28.0 (±10.2) vs 27.5 (±11.3)<br>E: 27.5 (±10.5) vs 27.1 (±11.2)<br>Difference (95%CI)<br>-0.1 (-0.9 to 0.7)                                                               | 0.0 (-0.1 to 0.2)      |
| Reuters, <sup>35</sup> 2012<br>6 months | 35 vs 36<br>7.3 vs 7.6<br>nr vs nr     | <b>Isometric quadriceps strengths (in % of age-, sex-, weight- and height-adjusted reference values)</b><br>Post-treatment / pre-treatment difference (SD)<br>Levothyroxine: 5.3 (±11.2)<br>Placebo: 0.8 (±19.6) | 0.3 (-0.2 to 0.8)      |
| <b>Blood pressure</b>                   |                                        |                                                                                                                                                                                                                  |                        |
| Stott, <sup>3</sup> 2017<br>12 months   | 368 vs 369<br>6.4 vs 6.4<br>3.6 vs 5.5 | <b>Systolic</b><br>B: 141.2 (±18.7) vs 140.4 (±18.9)<br>E: 138.3 (±18.7) vs 138.4 (±17.8)                                                                                                                        | na                     |
|                                         |                                        | <b>Diastolic</b><br>B: 74.1 (±11.6) vs 74.8 (±11.7)<br>E: 72.8 (±11.4) vs 73.5 (±11.1)                                                                                                                           | na                     |
| Zhao, <sup>5</sup> 2016<br>15 months    | 210 vs 159<br>6.0 vs 5.5<br>2.8 vs 4.9 | <b>Systolic</b><br>B: 148.6 (±20.0) vs 150.7 (±23.8)<br>E: 136.1 (±20.1) vs 138.6 (±19.8)                                                                                                                        | na                     |
|                                         |                                        | <b>Diastolic</b><br>B: 84.5 (±11.4) vs 85.8 (±11.5)<br>E: 79.4 (±11.0) vs 79.6 (±11.2)                                                                                                                           | na                     |

100

101



|                                                      |                                        |                                                                                                  |    |
|------------------------------------------------------|----------------------------------------|--------------------------------------------------------------------------------------------------|----|
| Ersoy, <sup>40</sup> 2012<br>6 months                | 30 vs 30<br>7.5 vs 6.8<br>3.6 vs 7.8   | <b>Systolic</b><br>B: 132.5 (±19.0) vs 127.8 (±18.8)<br>E: 131.7 (±17.9) vs 129.2 (±17.9)        | na |
|                                                      |                                        | <b>Diastolic</b><br>B: 79.8 (±10.4) vs 73.7 (±12.0)<br>E: 79.0 (±10.3) vs 74.3 (±11.5)           | na |
| Nagasaki, <sup>41</sup><br>2009<br>5 months          | 48 vs 47<br>7.3 vs 7.3<br>2.7 vs 7.0   | <b>Systolic</b><br>B: 132.8 (±26.7) vs 133.1 (23.1)<br>E: 128.8 (±26.1) vs 132.2 (±26.1)         | na |
|                                                      |                                        | <b>Diastolic</b><br>B: 74.3 (±19.7) vs 75.7 (±13)<br>E: 72.7 (±15.1) vs 72.8 (±13.6)             | na |
| Razvi, <sup>37</sup> 2007<br>3 months                | 100 (cross-over)<br>5.3<br>0.5         | <b>Systolic</b><br>E: 132.8 (±22.8) vs 134.6 (±22.9)<br>Difference (95%CI)<br>-1.8 (-4.6 to 1.0) | na |
|                                                      |                                        | <b>Diastolic</b><br>E: 78.8 (±10.3) vs 79.9 (±9.6)<br>Difference (95%CI)<br>-1.1 (-2.8 to 0.5)   | na |
| Yazici, <sup>42</sup> 2004<br>12 months              | 23 vs 22<br>8.5 vs 8.4<br>2.4 vs 8.4   | <b>Systolic</b><br>B: 124.1 (±11.9) vs 122.9 (±12.1)<br>E: 123.6 (±9.8) vs 123.1 (±9.8)          | na |
|                                                      |                                        | <b>Diastolic</b><br>B: 77.9 (±9.8) vs 78.5 (±7.9)<br>E: 76.7 (±8.9) vs 77.2 (±8.3)               | na |
| Monzani, <sup>43</sup><br>2004<br>6 months           | 23 vs 22<br>6.0 vs 5.7<br>1.3 vs 6.0   | <b>Systolic</b><br>B: 117 (±15) vs 112 (±13)<br>E: 112 (±15) vs 114 (±13)                        | na |
|                                                      |                                        | <b>Diastolic</b><br>B: 72 (±11) vs 71 (±9)<br>E: 69.9 (±9) vs 72 (±8)                            | na |
| Monzani, <sup>44</sup><br>2001<br>6 months           | 10 vs 10<br>5.4 vs 4.7<br>1.3 vs 4.6   | <b>Systolic</b><br>B: 115.3 (±7.1) vs 116.7 (±9.5)<br>E: 117.3 (±6.8) vs 116.8 (±9.6)            | na |
|                                                      |                                        | <b>Diastolic</b><br>B: 75.3 (±4.2) vs 70.5 (±6.9)<br>E: 74.8 (±7.2) vs 71.0 (±7.0)               | na |
| <b>Body-mass index</b>                               |                                        |                                                                                                  |    |
| Stott, <sup>3</sup> 2017<br>12 months                | 368 vs 369<br>6.4 vs 6.4<br>3.6 vs 5.5 | B: 28.1 (±5.3) vs 27.7 (±4.6)<br>E: 27.9 (±5.1) vs 27.7 (±4.6)                                   | na |
| Zhao, <sup>5</sup> 2016<br>15 months                 | 210 vs 159<br>6.0 vs 5.5<br>2.8 vs 4.9 | B: 26.0 (±3.2) vs 25.7 (±3.6)<br>E: 25.8 (±3.2) vs 25.7 (±3.6)                                   | na |
| Ersoy, <sup>40</sup> 2012<br>6 months                | 30 vs 30<br>7.5 vs 6.8<br>3.6 vs 7.8   | B: 30.1 (±6.1) vs 28.7 (±4.3)<br>E: 30.1 (±6.0) vs 28.9 (±4.2)                                   | na |
| Cabral, <sup>45</sup> 2011<br>12 months <sup>b</sup> | 14 vs 18<br>6.8 vs 6.8<br>3.0 vs 6.7   | B: 25.9 (±2.3) vs 26.2 (±2.7)<br>E: 25.8 (±2.3) vs 25.7 (±3.0)                                   | na |
| Nagasaki, <sup>41</sup><br>2009<br>5 months          | 48 vs 47<br>7.3 vs 7.3<br>2.7 vs 7.0   | B: 22.0 (±3.2) vs 22.2 (±3.5)<br>E: 21.8 (±3.2) vs 22.1 (±3.4)                                   | na |
| Teixeira, <sup>15</sup><br>2008<br>12 months         | 35 vs 25<br>7.5 vs 7.7<br>2.1 vs 4.9   | B: 26.7 (±1.7) vs 24.1 (±3.2)<br>E: 27.4 (±3.2) vs 24.5 (±3.3)                                   | na |
| Razvi, <sup>37</sup> 2007<br>3 months <sup>b,c</sup> | 50 vs 50<br>5.4 vs 5.3<br>nr vs nr     | B: 28.2 (±5.0) vs 28.8 (±5.4)<br>E: 28.1 (±5.2) vs 28.4 (±5.3)                                   | na |

|                                                                                             |                                         |                                                                                                                                                       |    |
|---------------------------------------------------------------------------------------------|-----------------------------------------|-------------------------------------------------------------------------------------------------------------------------------------------------------|----|
| Iqbal, <sup>46</sup> 2006<br>12 months                                                      | 32 vs 32<br>5.8 vs 5.4<br>1.5 vs 5.4    | B: 28.7 (±5.7) vs 27.1 (±3.7)<br>E: 28.4 (±5.8) vs 27.0 (±4.1)                                                                                        | na |
| Caraccio, <sup>47</sup><br>2005<br>6 months                                                 | 12 vs 11<br>4.4 vs 5.0<br>1.3 vs 5.1    | B: 22.8 (±3.0) vs 22.6 (±1.9)<br>E: 22.3 (±3.0) vs 22.7 (±1.9)                                                                                        | na |
| Yazici, <sup>42</sup> 2004<br>12 months                                                     | 23 vs 22<br>8.5 vs 8.4<br>2.4 vs 8.4    | B: 23.4 (±2.6) vs 22.9 (±2.8)<br>E: 22.8 (±3.4) vs 23.0 (±3.1)                                                                                        | na |
| Monzani, <sup>43</sup><br>2004<br>6 months                                                  | 23 vs 22<br>6.0 vs 5.7<br>1.3 vs 6.0    | B: 24.3 (±3.6) vs 25.0 (±3.5)<br>E: 23.7 (±3.5) vs 24.9 (±3.8)                                                                                        | na |
| Kong, <sup>26</sup> 2002<br>6 months                                                        | 23 vs 17<br>8.0 vs 7.3<br>3.4 vs 5.6    | B: 25.5 (±3.2) vs 27.2 (±4.9)<br>E: 25.4 (±3.2) vs 27.4 (±4.9)                                                                                        | na |
| Caraccio, <sup>48</sup><br>2002<br>6 months                                                 | 24 vs 25<br>6.0 vs 4.9<br>1.5 vs 4.9    | B: 24.2 (±3.2) vs 22.5 (±2.5)<br>E: 24.1 (±3.1) vs 22.8 (±2.7)                                                                                        | na |
| Monzani, <sup>44</sup><br>2001<br>6 months                                                  | 10 vs 10<br>5.4 vs 4.7<br>1.3 vs 4.6    | B: 23.5 (±4.8) vs 23.0 (±2.3)<br>E: 23.1 (±4.7) vs 23.1 (±2.2)                                                                                        | na |
| Cooper, <sup>49</sup> 1984<br>12 months                                                     | 17 vs 16<br>10.8 vs 11.1<br>2.6 vs 14.7 | B: 28.0 (±2.6) vs 25.0 (±4.6)<br>E: 28.1 (±2.6) vs 24.6 (±4.9)                                                                                        | na |
| <b>Cardiovascular events / Mortality / Side effects (hyperthyroidism due to overdosing)</b> |                                         |                                                                                                                                                       |    |
| Stott, <sup>3</sup> 2017<br>12 months                                                       | 368 vs 369<br>6.4 vs 6.4<br>3.6 vs 5.5  | <b>Fatal or nonfatal</b><br>18 (4.9%) vs 20 (5.4%)<br>Hazard ratio 0.89 (0.47 to 1.69)                                                                | na |
|                                                                                             |                                         | <b>Mortality</b><br>10 (2.7%) vs 5 (1.4%)<br>Hazard ratio 1.91 (0.65 to 5.60)                                                                         | na |
|                                                                                             |                                         | <b>Hyperthyroidism symptom score</b><br>B: 10.5 (±11.2) vs 10.5 (±11.2)<br>E: 10.5 (±10.8) vs 10.3 (±11.3)<br>Difference (95%CI)<br>0.6 (-0.7 to 1.9) | na |

103 **Abbreviations:** (± x) indicate Standard deviations, if not stated otherwise; **N**, number of participants; **SMD**,  
104 standardized mean difference; **CI**, confidence interval; **SE**, Standard error; **TSH**, thyroid-stimulating hormone  
105 (mIU/liter); **nr**, not reported; **EQ-5D**, Euro quality of life 5 dimensions questionnaire (range -0.59 to 1.00,  
106 higher scores indicate better quality of life); **ThyPRO** (Thyroid-related quality-of-life patient-reported  
107 outcome) **HypoThyroid Symptoms Score** (range 0 to 100, higher scores indicate more hypothyroid  
108 symptoms); **ThyPRO Tiredness score** (range 0 to 100, higher scores indicate more tiredness); **BDI**, Becks  
109 depression inventory (range 0 to 63, higher scores indicate worse depressive symptoms); **Zulewski score**  
110 (range 0 to 12 points, higher scores indicate worse hypothyroid symptoms); **SF-36**, Short Form Health  
111 Survey (range 0 to 100, higher scores indicate better quality of life); **HADS**, Hospital anxiety and depression  
112 scale (range 0 to 21, higher scores indicate worse depressive symptoms); **ThyDQoL**, 18-item underactive  
113 thyroid-dependent quality of life (range -9 to 3, higher scores indicate better quality of life); **QHC-30**, General  
114 health questionnaire 30 items (range 0 to 90 with Likert scoring, otherwise range 0 to 30, higher scores  
115 indicate worse quality of life); **IQR**, Interquartile range; **Billewicz score** (range -47 to 67, higher scores  
116 indicates worse hypothyroid symptoms); **Letter-digit coding test** (minimum score is 0, with higher scores  
117 indicating better executive cognitive function; there is no maximum score); **Wechsler memory scale** (range  
118 40 to 160, higher scores indicate better cognitive function); **MMSE**, Mini-Mental State Examination (range 0  
119 to 30, higher scores indicate better cognition); **Hyperthyroidism symptom score** (range 0 to 100, higher  
120 scores indicate more hyperthyroid symptoms); **na**, not applicable.

121 <sup>a</sup> Positive values indicate benefit of thyroid hormone replacement therapy

122 <sup>b</sup> Data obtained through direct communication with author

123 <sup>c</sup> This is actually a cross-over trial. However, for body-mass index, we only analyzed the first three months of  
124 treatment (before cross-over), i.e. the 50 participants initially randomized to levothyroxine vs the 50  
125 participants initially randomized to placebo

126 **eTable 3:** Risk of Bias Assessment of the 21 Included Randomized Controlled Trials, Adapted From a Template Suggested by the  
 127 Cochrane Collaboration<sup>50</sup> (See at the End of this Appendix, Section 5)

| Author, year                            | Random sequence generation | Allocation concealment | Blinding of participants and personnel | Blinding of outcome assessment | Incomplete outcome data | Selective outcome reporting |
|-----------------------------------------|----------------------------|------------------------|----------------------------------------|--------------------------------|-------------------------|-----------------------------|
| Stott, <sup>2</sup> 2017                | Low                        | Low                    | Low                                    | Low                            | Low                     | Low                         |
| Zhao, <sup>5</sup> 2016                 | Low                        | Low                    | High                                   | High                           | Low                     | High                        |
| Najafi, <sup>34</sup> 2015 <sup>a</sup> | Unclear                    | Unclear                | Unclear                                | Unclear                        | Low                     | Unclear                     |
| Ersoy, <sup>40</sup> 2012               | Low                        | Unclear                | High                                   | High                           | Unclear                 | Unclear                     |
| Aghili, <sup>11</sup> 2012 <sup>a</sup> | Unclear                    | Unclear                | Unclear                                | Unclear                        | Unclear                 | Unclear                     |
| Reuters, <sup>35</sup> 2012             | Unclear                    | Low                    | Low                                    | Low                            | High                    | Unclear                     |
| Cabral, <sup>45</sup> 2011              | Low                        | Low                    | High                                   | Low                            | Low                     | Unclear                     |
| Parle, <sup>36</sup> 2010               | Low                        | Low                    | Low                                    | Low                            | Unclear                 | Unclear                     |
| Nagasaki, <sup>41</sup> 2009            | Unclear                    | Unclear                | Low                                    | Low                            | Low                     | Unclear                     |
| Teixeira, <sup>15</sup> 2008            | Unclear                    | Unclear                | Low                                    | Low                            | High                    | Unclear                     |
| Razvi, <sup>37</sup> 2007               | Unclear                    | Unclear                | Low                                    | Low                            | Low                     | Low                         |
| Jorde, <sup>38</sup> 2006 <sup>b</sup>  | Unclear                    | Unclear                | Unclear                                | Low                            | Low                     | Unclear                     |
| Iqbal, <sup>46</sup> 2006 <sup>b</sup>  | Unclear                    | Unclear                | Unclear                                | Low                            | Unclear                 | Unclear                     |
| Caraccio, <sup>47</sup> 2005            | Unclear                    | Low                    | Low                                    | Low                            | Low                     | Unclear                     |
| Yazici, <sup>42</sup> 2004              | Unclear                    | Low                    | Low                                    | Low                            | Low                     | Unclear                     |
| Monzani, <sup>43</sup> 2004             | Unclear                    | Unclear                | Unclear                                | Unclear                        | Low                     | Unclear                     |
| Kong, <sup>26</sup> 2002                | Low                        | Low                    | Low                                    | Low                            | High                    | Unclear                     |
| Caraccio, <sup>48</sup> 2002            | Unclear                    | Unclear                | Unclear                                | Unclear                        | Low                     | Unclear                     |
| Monzani, <sup>44</sup> 2001             | Unclear                    | Unclear                | Unclear                                | Unclear                        | Unclear                 | Unclear                     |
| Meier, <sup>39</sup> 2001               | Low                        | Low                    | Low                                    | Low                            | Low                     | Low                         |
| Cooper, <sup>49</sup> 1984              | Unclear                    | Unclear                | Unclear                                | Low                            | Low                     | Unclear                     |

<sup>a, b</sup> These two studies used identical study populations, but reported different outcomes

128  
 129  
 130

131 **eTable 4:** Summary of Findings and Quality of Evidence (GRADE) on the Effect of Thyroid Hormone Therapy in Non-pregnant Adults  
 132 With Subclinical Hypothyroidism

| Outcomes                                                     | Pooled effect <sup>a</sup> (95% CI)<br>I <sup>2</sup> , p-value | Number of participants<br>(studies) | Quality of evidence<br>(GRADE) <sup>b</sup> | Comments                                                                                                                                                                                           |
|--------------------------------------------------------------|-----------------------------------------------------------------|-------------------------------------|---------------------------------------------|----------------------------------------------------------------------------------------------------------------------------------------------------------------------------------------------------|
| General quality of life<br>Follow-up [range]: 6 – 12 months  | -0.11 (-0.25 to 0.03)<br>66.7%, p=0.029                         | 796<br>(4 RCTs)                     | ☒ ☒ ☒ ☒<br>High <sup>c</sup>                | - Positive values indicate benefit of thyroid hormone therapy<br><br>- Risk of bias assessment ☒<br>- Inconsistency ☐ (downgrade 1)<br>- Indirectness ☒<br>- Imprecision ☒<br>- Publication bias ☒ |
| Thyroid-related symptoms<br>Follow-up [range]: 3 – 12 months | 0.01 (-0.12 to 0.14)<br>0.0%, p=0.79                            | 858<br>(4 RCTs)                     | ☒ ☒ ☒ ☒<br>High                             | - Positive values indicate benefit of thyroid hormone therapy<br><br>- Risk of bias assessment ☒<br>- Inconsistency ☒<br>- Indirectness ☒<br>- Imprecision ☒<br>- Publication bias ☒               |
| Depressive symptoms<br>Follow-up [range]: 6 – 12 months      | -0.10 (-0.34 to 0.13)<br>0.0%, p=0.84                           | 278<br>(4 RCTs)                     | ☒ ☒ ☒ ☐<br>Moderate                         | - Positive values indicate benefit of thyroid hormone therapy<br><br>- Risk of bias assessment ☒<br>- Inconsistency ☒<br>- Indirectness ☒<br>- Imprecision ☐ (downgrade 1)<br>- Publication bias ☒ |
| Fatigue / tiredness<br>Follow-up: 12 months                  | -0.01 (-0.16 to 0.15)<br>na                                     | 638<br>(1 RCT)                      | ☒ ☒ ☒ ☐<br>Moderate <sup>d</sup>            | - Positive values indicate benefit of thyroid hormone therapy<br><br>- Risk of bias assessment ☒<br>- Inconsistency ☐ na<br>- Indirectness ☒<br>- Imprecision ☒<br>- Publication bias ☒            |

133  
134

|                                                                             |                                       |                    |                              |                                                                                                                                                                                                    |
|-----------------------------------------------------------------------------|---------------------------------------|--------------------|------------------------------|----------------------------------------------------------------------------------------------------------------------------------------------------------------------------------------------------|
| Cognitive function<br>Follow-up [range]: 3 – 18 months                      | 0.09 (-0.05 to 0.22)<br>14.7%, p=0.32 | 859<br>(4 RCTs)    | ☒ ☒ ☒ ☐<br>Moderate          | - Positive values indicate benefit of thyroid hormone therapy<br><br>- Risk of bias assessment ☒<br>- Inconsistency ☒<br>- Indirectness ☒<br>- Imprecision ☐ (downgrade 1)<br>- Publication bias ☒ |
| Muscle strength<br>Follow-up [range]: 6 - 12 months                         | 0.1 (-0.1 to 0.2)<br>0.0%, p=0.36     | 695<br>(2 RCT)     | ☒ ☒ ☒ ☒<br>Moderate          | - Positive values indicate benefit of thyroid hormone therapy<br><br>- Risk of bias assessment ☒<br>- Inconsistency ☒<br>- Indirectness ☒<br>- Imprecision ☒<br>- Publication bias ☒               |
| Blood pressure (systolic, in mmHg)<br>Follow-up [range]: 3 – 12 months      | -0.7 (-2.6 to 1.2)<br>0.0%, p=0.95    | 1,372<br>(8 RCTs)  | ☒ ☒ ☒ ☒<br>High              | - Negative values indicate benefit of thyroid hormone therapy<br><br>- Risk of bias assessment ☒<br>- Inconsistency ☒<br>- Indirectness ☒<br>- Imprecision ☒<br>- Publication bias ☒               |
| Blood pressure (diastolic, in mmHg)<br>Follow-up [range]: 3 – 12 months     | -0.3 (-1.4 to 0.6)<br>0.0%, p=0.50    | 1,372<br>(8 RCTs)  | ☒ ☒ ☒ ☒<br>High              | - Negative values indicate benefit of thyroid hormone therapy<br><br>- Risk of bias assessment ☒<br>- Inconsistency ☒<br>- Indirectness ☒<br>- Imprecision ☒<br>- Publication bias ☒               |
| Body-mass index (in kg/m <sup>2</sup> )<br>Follow-up [range]: 3 – 12 months | 0.2 (-0.4 to 0.8)<br>45.5%, p=0.028   | 1,633<br>(15 RCTs) | ☒ ☒ ☒ ☒<br>High <sup>e</sup> | - Negative values indicate benefit of thyroid hormone therapy<br><br>- Risk of bias assessment ☒<br>- Inconsistency ☐ (downgrade 1)<br>- Indirectness ☒<br>- Imprecision ☒<br>- Publication bias ☒ |

|                                                                          |                                                  |                |                                  |                                                                                                                                                                                                   |
|--------------------------------------------------------------------------|--------------------------------------------------|----------------|----------------------------------|---------------------------------------------------------------------------------------------------------------------------------------------------------------------------------------------------|
| Cardiovascular events<br>Follow-up: 12 months                            | Hazard ratio<br>0.89 (0.47 to 1.69)              | 737<br>(1 RCT) | ☒ ☒ ☐ ☐<br>Low <sup>f</sup>      | - Values <1 indicate benefit of thyroid hormone therapy<br>- Risk of bias assessment ☒<br>- Inconsistency ☐ na<br>- Indirectness ☒<br>- Imprecision ☐ (downgrade 2)<br>- Publication bias ☒       |
| Mortality<br>Follow-up: 12 months                                        | Hazard ratio<br>1.91 (0.65 to 5.60)              | 737<br>(1 RCT) | ☒ ☒ ☐ ☐<br>Low <sup>f</sup>      | - Values <1 indicate benefit of thyroid hormone therapy<br>- Risk of bias assessment ☒<br>- Inconsistency ☐ na<br>- Indirectness ☒<br>- Imprecision ☐ (downgrade 2)<br>- Publication bias ☒       |
| Side effects (hyperthyroidism due to overdosing)<br>Follow-up: 12 months | Difference in symptom score<br>0.6 (-0.7 to 1.9) | 638<br>(1 RCT) | ☒ ☒ ☒ ☐<br>Moderate <sup>d</sup> | - Positive values indicate more side effects due to thyroid hormone therapy<br>- Risk of bias assessment ☒<br>- Inconsistency ☐ na<br>- Indirectness ☒<br>- Imprecision ☒<br>- Publication bias ☒ |

135  
136  
137  
138  
139  
140  
141  
142  
143  
144  
145  
146  
147  
148  
149  
150  
151

**Abbreviations:** CI, confidence interval; na, not applicable;

<sup>a</sup> Standardized mean difference (if not stated otherwise) from random effect meta-analysis, positive values indicate benefit of thyroid hormone therapy

<sup>b</sup> **GRADE** working group grades of evidence

**High quality:** We are very confident that the true effect lies close to that of the estimate of the effect

**Moderate quality:** We are moderately confident in the effect estimate: The true effect is likely to be close to the estimate of the effect, but there is a possibility that it is substantially different

**Low quality:** Our confidence in the effect estimate is limited: The true effect may be substantially different from the estimate of the effect

**Very low quality:** We have very little confidence in the effect estimate: The true effect is likely to be substantially different from the estimate of effect

<sup>c</sup> Upgrade of 1 as inconsistency was driven by one study showing benefit of placebo. Thus, we consider it high quality evidence that thyroid hormone therapy does not confer benefit.

<sup>d</sup> As only 1 well-conducted, adequately sized RCT is available for this outcome, we decided to downgrade 1

<sup>e</sup> Upgrade of 1 as we consider it high quality evidence that thyroid hormone therapy does not confer benefit (downgrade was due to inconsistency, but the “outlier” studies were in the direction of lower body-mass index under placebo).

<sup>f</sup> Downgrade 2 due to imprecision (results compatible with benefit as well as harm due to thyroid hormone therapy). Only one RCT reported on cardiovascular events and mortality, and the mean follow-up was 17 months, too short to thoroughly examine these outcomes.

- 154 1. Chen Y, Wu G, Xu M. The effect of L-thyroxine substitution on oxidative stress in early-stage diabetic  
155 nephropathy patients with subclinical hypothyroidism: a randomized double-blind and placebo-controlled  
156 study. *International urology and nephrology*. 2018;50(1):97-103.
- 157 2. Stott DJ, Gussekloo J, Kearney PM, et al. Study protocol; Thyroid hormone Replacement for Untreated older  
158 adults with Subclinical hypothyroidism - a randomised placebo controlled Trial (TRUST). *BMC Endocrine*  
159 *Disorders*. 2017;17:1-17.
- 160 3. Stott DJ, Rodondi N, Kearney PM, et al. Thyroid Hormone Therapy for Older Adults with Subclinical  
161 Hypothyroidism. *The New England journal of medicine*. 2017;376(26):2534-2544.
- 162 4. Liu L, Yu Y, Zhao M, et al. Benefits of Levothyroxine Replacement Therapy on Nonalcoholic Fatty Liver Disease  
163 in Subclinical Hypothyroidism Patients. *International journal of endocrinology*. 2017;2017:5753039.
- 164 5. Zhao M, Liu L, Wang F, et al. A Worthy Finding: Decrease in Total Cholesterol and Low-Density Lipoprotein  
165 Cholesterol in Treated Mild Subclinical Hypothyroidism. *Thyroid : official journal of the American Thyroid*  
166 *Association*. 2016;26(8):1019-1029.
- 167 6. Razvi S, Ingoe L, Ryan V, Pearce SHS, Wilkes S. Study of Optimal Replacement of Thyroxine in the Elderly  
168 (SORTED) - results from the feasibility randomised controlled trial. *Thyroid Research*. 2016;9.
- 169 7. Shahebrahimi K, Naseri R, Kalantarian TS, et al. Effects of levothyroxine treatment on lipid profile in  
170 subclinical hypothyroidism: A randomized clinical trial. *Galen Medical Journal*. 2015;4(2):72-77.
- 171 8. Liu P, Liu R, Chen X, et al. Can levothyroxine treatment reduce urinary albumin excretion rate in patients with  
172 early type 2 diabetic nephropathy and subclinical hypothyroidism? A randomized double-blind and placebo-  
173 controlled study. *Curr Med Res Opin*. 2015;31(12):2233-2240.
- 174 9. Deshmukh VC, Varthakavi PK. Role of l-thyroxine therapy in treatment of subclinical hypothyroidism (SCHT):  
175 6-month randomized controlled trial. *Thyroid : official journal of the American Thyroid Association*.  
176 2012;Conference: 82nd Annual Meeting of the American Thyroid Association Quebec City, QC Canada.  
177 Conference Start: 20120919 Conference End: 20120923. Conference Publication::A52-A53.
- 178 10. Malek M, Khamseh ME, Hadian A, Baradaran HR, Emami Z, Aghili R. The effect of L-thyroxine treatment on  
179 memory quotient in adults with subclinical hypothyroidism: A randomized double blind controlled trial.  
180 [Persian]. *Iranian Journal of Endocrinology and Metabolism*. 2012;13(6):624-629.
- 181 11. Aghili R, Khamseh ME, Malek M, et al. Changes of subtests of Wechsler Memory Scale and cognitive function  
182 in subjects with subclinical hypothyroidism following treatment with levothyroxine. *Archives of medical*  
183 *science : AMS*. 2012;8(6):1096-1101.
- 184 12. Martins RM, Fonseca RH, Duarte MM, et al. Impact of subclinical hypothyroidism treatment in systolic and  
185 diastolic cardiac function. *Arq Bras Endocrinol Metabol*. 2011;55(7):460-467.
- 186 13. Abu-Helalah M, Law MR, Bestwick JP, Monson JP, Wald NJ. A randomized double-blind crossover trial to  
187 investigate the efficacy of screening for adult hypothyroidism. *Journal of medical screening*. 2010;17(4):164-  
188 169.
- 189 14. Teixeira PF, Reuters VS, Ferreira MM, et al. Treatment of subclinical hypothyroidism reduces atherogenic lipid  
190 levels in a placebo-controlled double-blind clinical trial. *Hormone and metabolic research = Hormon- und*  
191 *Stoffwechselforschung = Hormones et metabolisme*. 2008;40(1):50-55.
- 192 15. Teixeira PF, Reuters VS, Ferreira MM, et al. Lipid profile in different degrees of hypothyroidism and effects of  
193 levothyroxine replacement in mild thyroid failure. *Transl Res*. 2008;151(4):224-231.
- 194 16. Mikhail GS, Alshammari SM, Alenezi MY, Mansour M, Khalil NA. Increased atherogenic low-density  
195 lipoprotein cholesterol in untreated subclinical hypothyroidism. *Endocrine practice : official journal of the*  
196 *American College of Endocrinology and the American Association of Clinical Endocrinologists*. 2008;14(5):570-  
197 575.
- 198 17. Kalantari S, Heidarzadeh A. Thyroxine Therapy Improves Serum Lipoproteins and Some Clinical Findings In  
199 Patients With Subclinical Hypothyroidism. *Int J Endocrinol Metab*. 2006;4:106-111.
- 200 18. Franzoni F, Galetta F, Fallahi P, et al. Effect of L-thyroxine treatment on left ventricular function in subclinical  
201 hypothyroidism. *Biomed Pharmacother*. 2006;60(8):431-436.
- 202 19. Fadeyev VV, Sytch J, Kalashnikov V, Rojzman A, Syrkin A, Melnichenko G. Levothyroxine replacement therapy  
203 in patients with subclinical hypothyroidism and coronary artery disease. *Endocrine practice : official journal of*  
204 *the American College of Endocrinology and the American Association of Clinical Endocrinologists*.  
205 2006;12(1):5-17.
- 206 20. Christ CM, Morgenthaler NG, Meier C, et al. Pro-A-type and N-terminal pro-B-type natriuretic peptides in  
207 different thyroid function states. *Swiss medical weekly*. 2005;135:549-554.

- 208 21. Meier C, Beat M, Guglielmetti M, Christ-Crain M, Staub JJ, Kraenzlin M. Restoration of euthyroidism  
209 accelerates bone turnover in patients with subclinical hypothyroidism: a randomized controlled trial.  
210 *Osteoporos. Int.* 2004;15(3):209-216.
- 211 22. Christ-Crain M, Meier C, Huber PR, Staub J-J, Muller B. Effect of L-thyroxine replacement therapy on  
212 surrogate markers of skeletal and cardiac function in subclinical hypothyroidism. *Endocrinologist.*  
213 2004;14(3):161-166.
- 214 23. Meier C, Christ-Crain M, Guglielmetti M, Huber P, Staub JJ, Muller B. Prolactin dysregulation in women with  
215 subclinical hypothyroidism: effect of levothyroxine replacement therapy. *Thyroid : official journal of the*  
216 *American Thyroid Association.* 2003;13(10):979-985.
- 217 24. Christ-Crain M, Meier C, Huber P, Zulewski H, Staub JJ, Muller B. Effect of restoration of euthyroidism on  
218 peripheral blood cells and erythropoietin in women with subclinical hypothyroidism. *Hormones (Athens).*  
219 2003;2(4):237-242.
- 220 25. Kong WM, Sheikh MH, Lumb PJ, et al. A 6-month randomized trial of thyroxine treatment in women with mild  
221 subclinical hypothyroidism. (vol 112, pg 348, 2002). *American Journal of Medicine.* 2002;113(5):442-442.
- 222 26. Kong WM, Sheikh MH, Lumb PJ, et al. A 6-month randomized trial of thyroxine treatment in women with mild  
223 subclinical hypothyroidism. *The American journal of medicine.* 2002;112(5):348-354.
- 224 27. Jenvovsky J, Ruzicka E, Spackova N, Hejdukova B. Changes of event related potential and cognitive processes  
225 in patients with subclinical hypothyroidism after thyroxine treatment. *Endocr Regul.* 2002;36(3):115-122.
- 226 28. Biondi B, Fazio S, Palmieri EA, et al. Left ventricular diastolic dysfunction in patients with subclinical  
227 hypothyroidism. *The Journal of clinical endocrinology and metabolism.* 1999;84(6):2064-2067.
- 228 29. Jaeschke R, Guyatt G, Gerstein H, et al. Does treatment with L-thyroxine influence health status in middle-  
229 aged and older adults with subclinical hypothyroidism? *Journal of general internal medicine.*  
230 1996;11(12):744-749.
- 231 30. Ross DS. Bone density is not reduced during the short-term administration of levothyroxine to  
232 postmenopausal women with subclinical hypothyroidism: a randomized, prospective study. *The American*  
233 *journal of medicine.* 1993;95(4):385-388.
- 234 31. Nikolai TF, Mulligan GM, Gribble RK, Harkins PG, Meier PR, Roberts RC. Thyroid function and treatment in  
235 premenstrual syndrome. *The Journal of clinical endocrinology and metabolism.* 1990;70(4):1108-1113.
- 236 32. Nystrom E, Caidahl K, Fager G, Wikkelso C, Lundberg PA, Lindstedt G. A double-blind cross-over 12-month  
237 study of L-thyroxine treatment of women with 'subclinical' hypothyroidism. *Clinical endocrinology.*  
238 1988;29(1):63-75.
- 239 33. Evered D, Young ET, Ormston BJ, Menzies R, Smith PA, Hall R. Treatment of hypothyroidism: a reappraisal of  
240 thyroxine therapy. *Br Med J.* 1973;3(5872):131-134.
- 241 34. Najafi L, Malek M, Hadian A, Ebrahim Valojerdi A, Khamseh ME, Aghili R. Depressive symptoms in patients  
242 with subclinical hypothyroidism--the effect of treatment with levothyroxine: a double-blind randomized  
243 clinical trial. *Endocrine research.* 2015;40(3):121-126.
- 244 35. Reuters VS, Almeida CP, Teixeira PF, et al. Effects of subclinical hypothyroidism treatment on psychiatric  
245 symptoms, muscular complaints, and quality of life. *Arq Bras Endocrinol Metabol.* 2012;56(2):128-136.
- 246 36. Parle J, Roberts L, Wilson S, et al. A randomized controlled trial of the effect of thyroxine replacement on  
247 cognitive function in community-living elderly subjects with subclinical hypothyroidism: the Birmingham  
248 Elderly Thyroid study. *The Journal of clinical endocrinology and metabolism.* 2010;95(8):3623-3632.
- 249 37. Razvi S, Ingoe L, Keeka G, Oates C, McMillan C, Weaver JU. The beneficial effect of L-thyroxine on  
250 cardiovascular risk factors, endothelial function, and quality of life in subclinical hypothyroidism: randomized,  
251 crossover trial. *The Journal of clinical endocrinology and metabolism.* 2007;92(5):1715-1723.
- 252 38. Jorde R, Waterloo K, Storhaug H, Nyrnes A, Sundsfjord J, Jenssen TG. Neuropsychological function and  
253 symptoms in subjects with subclinical hypothyroidism and the effect of thyroxine treatment. *The Journal of*  
254 *clinical endocrinology and metabolism.* 2006;91(1):145-153.
- 255 39. Meier C, Staub JJ, Roth CB, et al. TSH-controlled L-thyroxine therapy reduces cholesterol levels and clinical  
256 symptoms in subclinical hypothyroidism: a double blind, placebo-controlled trial (Basel Thyroid Study). *The*  
257 *Journal of clinical endocrinology and metabolism.* 2001;86(10):4860-4866.
- 258 40. Ersoy I, Banu KK, Bagci O, et al. Effects of Levothyroxine Treatment on Cardiovascular Risk Profile and Carotid  
259 Intima Media Thickness in Patients with Subclinical Hypothyroidism. *Acta Endocrinologica-Bucharest.*  
260 2012;8(3):433-442.
- 261 41. Nagasaki T, Inaba M, Yamada S, et al. Decrease of brachial-ankle pulse wave velocity in female subclinical  
262 hypothyroid patients during normalization of thyroid function: a double-blind, placebo-controlled study.  
263 *European journal of endocrinology / European Federation of Endocrine Societies.* 2009;160(3):409-415.
- 264 42. Yazici M, Gorgulu S, Sertbas Y, et al. Effects of thyroxin therapy on cardiac function in patients with subclinical  
265 hypothyroidism: index of myocardial performance in the evaluation of left ventricular function. *International*  
266 *journal of cardiology.* 2004;95(2-3):135-143.



- 267 43. Monzani F, Caraccio N, Kozakowa M, et al. Effect of levothyroxine replacement on lipid profile and intima-  
268 media thickness in subclinical hypothyroidism: a double-blind, placebo- controlled study. *The Journal of*  
269 *clinical endocrinology and metabolism*. 2004;89(5):2099-2106.
- 270 44. Monzani F, Di Bello V, Caraccio N, et al. Effect of levothyroxine on cardiac function and structure in subclinical  
271 hypothyroidism: a double blind, placebo-controlled study. *The Journal of clinical endocrinology and*  
272 *metabolism*. 2001;86(3):1110-1115.
- 273 45. Cabral MD, Teixeira P, Soares D, Leite S, Salles E, Waisman M. Effects of thyroxine replacement on endothelial  
274 function and carotid artery intima-media thickness in female patients with mild subclinical hypothyroidism.  
275 *Clinics (Sao Paulo, Brazil)*. 2011;66(8):1321-1328.
- 276 46. Iqbal A, Jorde R, Figenschau Y. Serum lipid levels in relation to serum thyroid-stimulating hormone and the  
277 effect of thyroxine treatment on serum lipid levels in subjects with subclinical hypothyroidism: the Tromso  
278 Study. *Journal of internal medicine*. 2006;260(1):53-61.
- 279 47. Caraccio N, Natali A, Sironi A, et al. Muscle metabolism and exercise tolerance in subclinical hypothyroidism:  
280 a controlled trial of levothyroxine. *The Journal of clinical endocrinology and metabolism*. 2005;90(7):4057-  
281 4062.
- 282 48. Caraccio N, Ferrannini E, Monzani F. Lipoprotein profile in subclinical hypothyroidism: response to  
283 levothyroxine replacement, a randomized placebo-controlled study. *The Journal of clinical endocrinology and*  
284 *metabolism*. 2002;87(4):1533-1538.
- 285 49. Cooper DS, Halpern R, Wood LC, Levin AA, Ridgway EC. L-Thyroxine therapy in subclinical hypothyroidism. A  
286 double-blind, placebo-controlled trial. *Annals of internal medicine*. 1984;101(1):18-24.
- 287 50. Effective Practice and Organisation of Care (EPOC). Data collection form. EPOC Resources for review authors.  
288 Oslo: Norwegian Knowledge Centre for the Health Services.  
289 [http://epoc.cochrane.org/sites/epoc.cochrane.org/files/public/uploads/Resources-for-](http://epoc.cochrane.org/sites/epoc.cochrane.org/files/public/uploads/Resources-for-authors2017/good_practice_data_extraction_form.doc)  
290 [authors2017/good\\_practice\\_data\\_extraction\\_form.doc](http://epoc.cochrane.org/sites/epoc.cochrane.org/files/public/uploads/Resources-for-authors2017/good_practice_data_extraction_form.doc) (last accessed July 6, 2018). 2017.  
291

292

293

# eAppendix 2:

294

## Data collection form (adapted)

295

### Intervention review – RCTs

296

297 This form can be used as a guide for developing your own data extraction form. Sections can be expanded  
 298 and added, and irrelevant sections can be removed. It is difficult to design a single form that meets the  
 299 needs of all reviews, so it is important to consider carefully the information you need to collect, and design  
 300 your form accordingly. Information included on this form should be comprehensive, and may be used in the  
 301 text of your review, 'Characteristics of included studies' table, risk of bias assessment, and statistical  
 302 analysis.

303

304 Notes on using a data extraction form:

- 305 • Be consistent in the order and style you use to describe the information for each included study.
- 306 • Record any missing information as unclear or not described, to make it clear that the information was not  
 307 found in the study report(s), not that you forgot to extract it.
- 308 • Include any instructions and decision rules on the data collection form, or in an accompanying document.  
 309 It is important to practice using the form and give training to any other authors using the form.
- 310 • You will need to protect the document in order to use the form fields (Tools / Protect document)

311

|                                                                                                                                           |
|-------------------------------------------------------------------------------------------------------------------------------------------|
| <b>Review title or ID</b>                                                                                                                 |
| Thyroid hormone replacement therapy for subclinical hypothyroidism: a systematic review and meta-analysis of randomized-controlled trials |

312

|                                                                                                                      |
|----------------------------------------------------------------------------------------------------------------------|
| <b>Study ID</b> ( <i>surname of first author and year first full report of study was published e.g. Smith 2001</i> ) |
|                                                                                                                      |

313

|                                                                                                            |
|------------------------------------------------------------------------------------------------------------|
| <b>Report IDs of other reports of this study</b> ( <i>e.g. duplicate publications, follow-up studies</i> ) |
|                                                                                                            |

314

|               |
|---------------|
| <b>Notes:</b> |
|---------------|

315

#### 1. General Information

|                                                                                                  |  |
|--------------------------------------------------------------------------------------------------|--|
| 1. <b>Date form completed</b><br><i>(dd/mm/yyyy)</i>                                             |  |
| 2. <b>Name/ID of person extracting data</b>                                                      |  |
| 3. <b>Report title</b><br><i>(title of paper/ abstract/ report that data are extracted from)</i> |  |

|                                                                             |  |
|-----------------------------------------------------------------------------|--|
| 4. <b>Report ID</b><br><i>(if there are multiple reports of this study)</i> |  |
| 5. <b>Reference details</b>                                                 |  |
| 6. <b>Report author contact details</b>                                     |  |
| 7. <b>Publication type</b><br><i>(e.g. full report, abstract, letter)</i>   |  |
| 8. <b>Study funding source</b><br><i>(including role of funders)</i>        |  |
| <b>Possible conflicts of interest</b><br><i>(for study authors)</i>         |  |
| 9. <b>Notes:</b> Protocol registration number:                              |  |

316

## 2. Eligibility

| <b>Study Characteristics</b>         | <b>Review Inclusion Criteria</b><br><i>(Insert inclusion criteria for each characteristic as defined in the Protocol)</i>                                                                                     | <b>Yes/ No / Unclear</b> | <b>Location in text</b><br><i>(pg &amp; ¶/fig/table)</i> |
|--------------------------------------|---------------------------------------------------------------------------------------------------------------------------------------------------------------------------------------------------------------|--------------------------|----------------------------------------------------------|
| 10. <b>Type of study</b>             | Randomised trial                                                                                                                                                                                              | ...                      |                                                          |
|                                      | Non-randomised trial                                                                                                                                                                                          | ...                      |                                                          |
|                                      | Controlled before-after study <ul style="list-style-type: none"> <li>Contemporaneous data collection</li> <li>At least 2 intervention and 2 control clusters</li> </ul>                                       | ...                      |                                                          |
|                                      | Interrupted time series OR<br>Repeated measures study <ul style="list-style-type: none"> <li>At least 3 timepoints before and 3 after the intervention</li> <li>Clearly defined intervention point</li> </ul> | ...                      |                                                          |
|                                      | Other design (specify):                                                                                                                                                                                       | ...                      |                                                          |
| 11. <b>Participants</b>              |                                                                                                                                                                                                               | ...                      |                                                          |
| 12. <b>Types of intervention</b>     |                                                                                                                                                                                                               | ...                      |                                                          |
| 13. <b>Types of outcome measures</b> |                                                                                                                                                                                                               | ...                      |                                                          |
| 14. <b>Decision:</b>                 | ...                                                                                                                                                                                                           |                          |                                                          |
| 15. <b>Reason for exclusion</b>      |                                                                                                                                                                                                               |                          |                                                          |
| 16. <b>Notes:</b>                    |                                                                                                                                                                                                               |                          |                                                          |

317  
318  
319

**DO NOT PROCEED IF STUDY EXCLUDED FROM REVIEW**

### 3. Population and setting

|                                                                                       | <b>Description</b><br><i>Include comparative information for each group (i.e. intervention and controls) if available</i> | <b>Location in text</b><br><i>(pg &amp; ¶/fig/table)</i> |
|---------------------------------------------------------------------------------------|---------------------------------------------------------------------------------------------------------------------------|----------------------------------------------------------|
| 17. <b>Population description</b><br><i>(from which study participants are drawn)</i> |                                                                                                                           |                                                          |
| 18. <b>Setting</b><br><i>(including location and social context)</i>                  |                                                                                                                           |                                                          |
| 19. <b>Inclusion criteria</b>                                                         |                                                                                                                           |                                                          |
| 20. <b>Exclusion criteria</b>                                                         |                                                                                                                           |                                                          |
| 21. <b>Method/s of recruitment of participants</b>                                    |                                                                                                                           |                                                          |
| 22. <b>Notes:</b>                                                                     |                                                                                                                           |                                                          |

### 4. Methods

|                                                                                         | <b>Descriptions as stated in report/paper</b> | <b>Location in text</b><br><i>(pg &amp; ¶/fig/table)</i> |
|-----------------------------------------------------------------------------------------|-----------------------------------------------|----------------------------------------------------------|
| 23. <b>Aim of study</b>                                                                 |                                               |                                                          |
| 24. <b>Design</b><br><i>(has to be RCT)</i>                                             |                                               |                                                          |
| 25. <b>Unit of allocation</b><br><i>(by individuals, cluster/ groups or body parts)</i> |                                               |                                                          |
| 26. <b>Start date</b>                                                                   |                                               |                                                          |
| 27. <b>End date</b>                                                                     |                                               |                                                          |
| 28. <b>Duration of participation</b><br><i>(from recruitment to last follow-up)</i>     |                                               |                                                          |
| 29. <b>Notes:</b>                                                                       |                                               |                                                          |

323

## 5. Risk of Bias assessment

324

See [Chapter 8](#) of the Cochrane Handbook. Additional domains may be required for non-randomised

325

studies.

| Domain                                                                         | Risk of bias<br><i>Low/ High/Unclear</i> | Support for<br>judgement             | Location in text<br><i>(pg &amp; ¶/fig/table)</i> |
|--------------------------------------------------------------------------------|------------------------------------------|--------------------------------------|---------------------------------------------------|
| 30. <b>Random sequence generation</b><br><i>(selection bias)</i>               | ...                                      |                                      |                                                   |
| 31. <b>Allocation concealment</b><br><i>(selection bias)</i>                   | ...                                      |                                      |                                                   |
| 32. <b>Blinding of participants and personnel</b><br><i>(performance bias)</i> | ...                                      | <b>Outcome group:</b><br><b>All/</b> |                                                   |
| <i>(if required)</i>                                                           | ...                                      | <b>Outcome group:</b>                |                                                   |
| 33. <b>Blinding of outcome assessment</b><br><i>(detection bias)</i>           | ...                                      | <b>Outcome group:</b><br><b>All/</b> |                                                   |
| <i>(if required)</i>                                                           | ...                                      | <b>Outcome group:</b>                |                                                   |
| 34. <b>Incomplete outcome data</b><br><i>(attrition bias)</i>                  | ...                                      |                                      |                                                   |
| 35. <b>Selective outcome reporting?</b><br><i>(reporting bias)</i>             | ...                                      |                                      |                                                   |
| 36. <b>Other bias</b>                                                          | ...                                      |                                      |                                                   |
| 37. <b>Notes:</b>                                                              |                                          |                                      |                                                   |

326

## 6. Participants

327

Provide overall data and, if available, comparative data for each intervention or comparison group.

|                                                                                       | Description as stated in report/paper | Location in text<br><i>(pg &amp; ¶/fig/table)</i> |
|---------------------------------------------------------------------------------------|---------------------------------------|---------------------------------------------------|
| 38. <b>Total no. randomised</b><br><i>(or total pop. at start of study for NRCTs)</i> |                                       |                                                   |
| 39. <b>Clusters</b><br><i>(if applicable, no., type, no. people per cluster)</i>      |                                       |                                                   |
| 40. <b>Baseline imbalances</b>                                                        |                                       |                                                   |

|                                                                                    | Description as stated in report/paper | Location in text<br>(pg & ¶/fig/table) |
|------------------------------------------------------------------------------------|---------------------------------------|----------------------------------------|
| 41. <b>Withdrawals and exclusions</b><br><i>(if not provided below by outcome)</i> |                                       |                                        |
| 42. <b>Age</b>                                                                     |                                       |                                        |
| 43. <b>Sex</b>                                                                     |                                       |                                        |
| 44. <b>Race/Ethnicity</b>                                                          |                                       |                                        |
| 45. <b>Severity of illness</b>                                                     |                                       |                                        |
| 46. <b>Co-morbidities</b>                                                          |                                       |                                        |
| 47. <b>Other treatment received</b><br><i>(additional to study intervention)</i>   |                                       |                                        |
| 48. <b>Other relevant sociodemographics</b>                                        |                                       |                                        |
| 49. <b>Subgroups measured</b>                                                      |                                       |                                        |
| 50. <b>Subgroups reported</b>                                                      |                                       |                                        |
| 51. <b>Notes:</b>                                                                  |                                       |                                        |

328

329 **7. Intervention groups**

330 *Copy and paste table for each intervention and comparison group*

331 **Intervention Group**

|                                                                                                                                                                            | Description as stated in report/paper | Location in text<br>(pg & ¶/fig/table) |
|----------------------------------------------------------------------------------------------------------------------------------------------------------------------------|---------------------------------------|----------------------------------------|
| 52. <b>Group name</b>                                                                                                                                                      |                                       |                                        |
| 53. <b>No. randomised to group</b><br><i>(specify whether no. people or clusters)</i>                                                                                      |                                       |                                        |
| 54. <b>Description</b><br><i>(include sufficient detail for replication, e.g. content, dose, components; if it is a natural experiment, describe the pre-intervention)</i> |                                       |                                        |
| 55. <b>Duration of treatment period</b>                                                                                                                                    |                                       |                                        |
| 56. <b>Timing</b><br><i>(e.g. frequency, duration of each episode)</i>                                                                                                     |                                       |                                        |

|                                                                                                             | Description as stated in report/paper | Location in text<br>(pg & ¶/fig/table) |
|-------------------------------------------------------------------------------------------------------------|---------------------------------------|----------------------------------------|
| 57. <b>Delivery</b><br>(e.g. mechanism, medium, intensity, fidelity)                                        |                                       |                                        |
| 58. <b>Providers</b><br>(e.g. no., profession, training, ethnicity etc. if relevant)                        |                                       |                                        |
| 59. <b>Co-interventions</b>                                                                                 |                                       |                                        |
| 60. <b>Economic variables</b><br>(i.e. intervention cost, changes in other costs as result of intervention) |                                       |                                        |
| 61. <b>Resource requirements to replicate intervention</b><br>(e.g. staff numbers, cold chain, equipment)   |                                       |                                        |
| 62. <b>Notes:</b>                                                                                           |                                       |                                        |

332

333 **Control Group**

|                                                                                                                                                                     | Description as stated in report/paper | Location in text<br>(pg & ¶/fig/table) |
|---------------------------------------------------------------------------------------------------------------------------------------------------------------------|---------------------------------------|----------------------------------------|
| 63. <b>Group name</b>                                                                                                                                               |                                       |                                        |
| 64. <b>No. randomised to group</b><br>(specify whether no. people or clusters)                                                                                      |                                       |                                        |
| 65. <b>Description</b><br>(include sufficient detail for replication, e.g. content, dose, components; if it is a natural experiment, describe the pre-intervention) |                                       |                                        |
| 66. <b>Duration of treatment period</b>                                                                                                                             |                                       |                                        |
| 67. <b>Timing</b><br>(e.g. frequency, duration of each episode)                                                                                                     |                                       |                                        |
| 68. <b>Delivery</b><br>(e.g. mechanism, medium, intensity, fidelity)                                                                                                |                                       |                                        |

|                                                                                                             | Description as stated in report/paper | Location in text<br>(pg & ¶/fig/table) |
|-------------------------------------------------------------------------------------------------------------|---------------------------------------|----------------------------------------|
| 69. <b>Providers</b><br>(e.g. no., profession, training, ethnicity etc. if relevant)                        |                                       |                                        |
| 70. <b>Co-interventions</b>                                                                                 |                                       |                                        |
| 71. <b>Economic variables</b><br>(i.e. intervention cost, changes in other costs as result of intervention) |                                       |                                        |
| 72. <b>Resource requirements to replicate intervention</b><br>(e.g. staff numbers, cold chain, equipment)   |                                       |                                        |
| 73. <b>Notes:</b>                                                                                           |                                       |                                        |

334

335

336 **8. Outcomes**

337 Copy and paste table for each outcome.

338 **Outcome 1**

|                                                                                                                                                         | Description as stated in report/paper | Location in text<br>(pg & ¶/fig/table) |
|---------------------------------------------------------------------------------------------------------------------------------------------------------|---------------------------------------|----------------------------------------|
| 74. <b>Outcome name</b>                                                                                                                                 |                                       |                                        |
| 75. <b>Time points measured</b><br>(specify whether from start or end of intervention)                                                                  |                                       |                                        |
| 76. <b>Time points reported</b>                                                                                                                         |                                       |                                        |
| 77. <b>Outcome definition</b><br>(with diagnostic criteria if relevant and note whether the outcome is desirable or undesirable if this is not obvious) |                                       |                                        |
| 78. <b>Person measuring/ reporting</b>                                                                                                                  |                                       |                                        |
| 79. <b>Unit of measurement</b><br>(if relevant)                                                                                                         |                                       |                                        |



|                                                                                     | Description as stated in report/paper |  | Location in text<br>(pg & ¶/fig/table) |
|-------------------------------------------------------------------------------------|---------------------------------------|--|----------------------------------------|
| 80. Scales: upper and lower limits<br>(indicate whether high or low score is good)  |                                       |  |                                        |
| 81. Is outcome/tool validated?                                                      | ...                                   |  |                                        |
|                                                                                     | Yes/No/Unclear                        |  |                                        |
| 82. Imputation of missing data<br>(e.g. assumptions made for ITT analysis)          |                                       |  |                                        |
| 83. Assumed risk estimate<br>(e.g. baseline or population risk noted in Background) |                                       |  |                                        |
| 84. Notes:                                                                          |                                       |  |                                        |

339 **9. Results**

340 Copy and paste the appropriate table for each outcome, including additional tables for each time point and  
341 subgroup as required.

342 **For randomised or non-randomised trial - Dichotomous outcome**

|                                                                                                                                          | Description as stated in report/paper |                  |                   |                  | Location in text<br>(pg & ¶/fig/table) |
|------------------------------------------------------------------------------------------------------------------------------------------|---------------------------------------|------------------|-------------------|------------------|----------------------------------------|
| 85. Comparison                                                                                                                           |                                       |                  |                   |                  |                                        |
| 86. Outcome                                                                                                                              |                                       |                  |                   |                  |                                        |
| 87. Subgroup                                                                                                                             |                                       |                  |                   |                  |                                        |
| 88. Time point<br>(specify whether from start or end of intervention)                                                                    |                                       |                  |                   |                  |                                        |
| 89. Results<br>Note whether:<br>... post-intervention OR<br>... change from baseline<br>And whether<br>... Adjusted OR<br>... Unadjusted | <b>Intervention</b>                   |                  | <b>Comparison</b> |                  |                                        |
|                                                                                                                                          | No. events                            | No. participants | No. events        | No. participants |                                        |
|                                                                                                                                          |                                       |                  |                   |                  |                                        |
| 90. Baseline data                                                                                                                        | <b>Intervention</b>                   |                  | <b>Comparison</b> |                  |                                        |
|                                                                                                                                          | No. events                            | No. participants | No. events        | No. participants |                                        |
|                                                                                                                                          |                                       |                  |                   |                  |                                        |

|                                                                                                                      | Description as stated in report/paper |  | Location in text<br><i>(pg &amp; ¶/fig/table)</i> |
|----------------------------------------------------------------------------------------------------------------------|---------------------------------------|--|---------------------------------------------------|
| 91. <b>No. missing participants and reasons</b>                                                                      |                                       |  |                                                   |
| 92. <b>No. participants moved from other group and reasons</b>                                                       |                                       |  |                                                   |
| 93. <b>Any other results reported</b>                                                                                |                                       |  |                                                   |
| 94. <b>Unit of analysis</b><br><i>(e.g. by individuals, health professional, practice, hospital, community)</i>      |                                       |  |                                                   |
| 95. <b>Statistical methods used and appropriateness of these methods</b><br><i>(e.g. adjustment for correlation)</i> |                                       |  |                                                   |
| 96. <b>Reanalysis required?</b><br><i>(if yes, specify why, e.g. correlation adjustment)</i>                         | ...<br><i>Yes/No/Unclear</i>          |  |                                                   |
| 97. <b>Reanalysis possible?</b>                                                                                      | ...<br><i>Yes/No/Unclear</i>          |  |                                                   |
| 98. <b>Reanalysed results</b>                                                                                        |                                       |  |                                                   |
| 99. <b>Notes:</b>                                                                                                    |                                       |  |                                                   |

343

**For randomised or non-randomised trial - Continuous outcome**

|                                                                                      | Description as stated in report/paper |                              |                     | Location in text<br><i>(pg &amp; ¶/fig/table)</i> |                              |                     |
|--------------------------------------------------------------------------------------|---------------------------------------|------------------------------|---------------------|---------------------------------------------------|------------------------------|---------------------|
| 100. <b>Comparison</b>                                                               |                                       |                              |                     |                                                   |                              |                     |
| 101. <b>Outcome</b>                                                                  |                                       |                              |                     |                                                   |                              |                     |
| 102. <b>Subgroup</b>                                                                 |                                       |                              |                     |                                                   |                              |                     |
| 103. <b>Time point</b><br><i>(specify whether from start or end of intervention)</i> |                                       |                              |                     |                                                   |                              |                     |
| 104. <b>Post-intervention or change from baseline?</b>                               |                                       |                              |                     |                                                   |                              |                     |
| 105. <b>Results</b><br><i>Note whether: ... post-intervention OR</i>                 | Intervention                          |                              |                     | Comparison                                        |                              |                     |
|                                                                                      | Mea<br>n                              | SD (or<br>other<br>variance) | No.<br>participants | Mea<br>n                                          | SD (or<br>other<br>variance) | No.<br>participants |

|                                                                                                                |                     | Description as stated in report/paper |                     |                   |                              |                     | Location in text<br>(pg & ¶/fig/table) |
|----------------------------------------------------------------------------------------------------------------|---------------------|---------------------------------------|---------------------|-------------------|------------------------------|---------------------|----------------------------------------|
| ... change from baseline<br>And whether<br>... Adjusted OR<br>...Unadjusted                                    |                     |                                       |                     |                   |                              |                     |                                        |
| 106. <b>Baseline data</b>                                                                                      | <b>Intervention</b> |                                       |                     | <b>Comparison</b> |                              |                     |                                        |
|                                                                                                                | Mea<br>n            | SD (or<br>other<br>variance)          | No.<br>participants | Mea<br>n          | SD (or<br>other<br>variance) | No.<br>participants |                                        |
|                                                                                                                |                     |                                       |                     |                   |                              |                     |                                        |
| 107. <b>No. missing participants and reasons</b>                                                               |                     |                                       |                     |                   |                              |                     |                                        |
| 108. <b>No. participants moved from other group and reasons</b>                                                |                     |                                       |                     |                   |                              |                     |                                        |
| 109. <b>Any other results reported</b>                                                                         |                     |                                       |                     |                   |                              |                     |                                        |
| 110. <b>Unit of analysis</b><br>(e.g. by individuals, health professional, practice, hospital, community)      |                     |                                       |                     |                   |                              |                     |                                        |
| 111. <b>Statistical methods used and appropriateness of these methods</b><br>(e.g. adjustment for correlation) |                     |                                       |                     |                   |                              |                     |                                        |
| 112. <b>Reanalysis required?</b><br>(if yes, specify why)                                                      | ...                 |                                       |                     |                   |                              |                     |                                        |
| 113. <b>Reanalysis possible?</b>                                                                               | ...                 |                                       |                     |                   |                              |                     |                                        |
| 114. <b>Reanalysed results</b>                                                                                 |                     |                                       |                     |                   |                              |                     |                                        |
| 115. <b>Notes:</b>                                                                                             |                     |                                       |                     |                   |                              |                     |                                        |

**For randomised or non-randomised trial - Other outcome**

|                                                                                                           | Description as stated in report/paper |                        |                        |                        | Location in text<br>(pg & ¶/fig/table) |
|-----------------------------------------------------------------------------------------------------------|---------------------------------------|------------------------|------------------------|------------------------|----------------------------------------|
| 116. <b>Comparison</b>                                                                                    |                                       |                        |                        |                        |                                        |
| 117. <b>Outcome</b>                                                                                       |                                       |                        |                        |                        |                                        |
| 118. <b>Subgroup</b>                                                                                      |                                       |                        |                        |                        |                                        |
| 119. <b>Time point</b><br>(specify whether from start or end of intervention)                             |                                       |                        |                        |                        |                                        |
| 120. <b>Type of outcome</b>                                                                               |                                       |                        |                        |                        |                                        |
| 121. <b>Results</b>                                                                                       | Intervention result                   | SD (or other variance) | Control result         | SD (or other variance) |                                        |
|                                                                                                           |                                       |                        |                        |                        |                                        |
|                                                                                                           | Overall results                       |                        | SE (or other variance) |                        |                                        |
|                                                                                                           |                                       |                        |                        |                        |                                        |
| 122. <b>No. participant</b>                                                                               | Intervention                          |                        | Control                |                        |                                        |
|                                                                                                           |                                       |                        |                        |                        |                                        |
| 123. <b>No. missing participants and reasons</b>                                                          |                                       |                        |                        |                        |                                        |
| 124. <b>No. participants moved from other group and reasons</b>                                           |                                       |                        |                        |                        |                                        |
| 125. <b>Any other results reported</b>                                                                    |                                       |                        |                        |                        |                                        |
| 126. <b>Unit of analysis</b><br>(e.g. by individuals, health professional, practice, hospital, community) |                                       |                        |                        |                        |                                        |
| 127. <b>Statistical methods used and appropriateness of these methods</b>                                 |                                       |                        |                        |                        |                                        |
| 128. <b>Reanalysis required?</b><br>(if yes, specify why)                                                 | ...                                   |                        |                        |                        |                                        |
| 129. <b>Reanalysis possible?</b>                                                                          | ...                                   |                        |                        |                        |                                        |
| 130. <b>Reanalysed results</b>                                                                            |                                       |                        |                        |                        |                                        |
| 131. <b>Notes:</b>                                                                                        |                                       |                        |                        |                        |                                        |

**10. Applicability**

|                                                                                                                                                                   |                       |  |
|-------------------------------------------------------------------------------------------------------------------------------------------------------------------|-----------------------|--|
| 132. <b>Have important populations been excluded from the study?</b><br>(consider disadvantaged populations, and possible differences in the intervention effect) | ...<br>Yes/No/Unclear |  |
| 133. <b>Is the intervention likely to be aimed at disadvantaged groups?</b><br>(e.g. lower socioeconomic groups)                                                  | ...<br>Yes/No/Unclear |  |
| 134. <b>Does the study directly address the review question?</b><br>(any issues of partial or indirect applicability)                                             | ...<br>Yes/No/Unclear |  |
| 135. <b>Notes:</b>                                                                                                                                                |                       |  |

**11. Other information**

|                                                                                           | Description as stated in report/paper | Location in text<br>(pg & ¶/fig/table) |
|-------------------------------------------------------------------------------------------|---------------------------------------|----------------------------------------|
| 136. <b>Key conclusions of study authors</b>                                              |                                       |                                        |
| 137. <b>References to other relevant studies</b>                                          |                                       |                                        |
| 138. <b>Correspondence required for further study information</b><br>(what and from whom) |                                       |                                        |
| 139. <b>Further study information requested</b><br>(from whom, what and when)             |                                       |                                        |
| 140. <b>Correspondence received</b><br>(from whom, what and when)                         |                                       |                                        |
| 141. <b>Notes:</b>                                                                        |                                       |                                        |
